# Supplementary material for: In-line digital holographic microscopy using a consumer scanner
Source: PubMed Central journal article supplement (PMC3773619; doi:10.1038/srep02664), 2013-09-16
Supplement: srep02664-s2.pdf [file srep02664-s2.pdf]

## Supplementary Information

Article Title:

In-line digital holographic microscopy using a consumer scanner

Authors :

Tomoyoshi Shimobaba, Hiroya Yamanashi, Takashi Kakue, Minoru Oikawa,  
Naohisa Okada, Yutaka Endo, Ryuji Hirayama, Nobuyuki Masuda,  
Tomoyoshi Ito

File name of the movie : movie.mov

The movie is associated with Figure 2.
